# Supplementary material for: Prevailing Questions and Methodologies in Biology Education Research: A Longitudinal Analysis of Research in CBE—Life Sciences Education and at the Society for the Advancement of Biology Education Research
Source: Atypon-hosted journal article supplement (doi:10.1187/cbe.18-08-0164), 2019-03-01
Supplement: combinedsupmats.pdf [file combinedsupmats.pdf]

# Supplemental Material

*CBE—Life Sciences Education*

Lo *et al.*

**Prevailing questions and methodologies in biology education research: A longitudinal analysis of research in *CBE-Life Sciences Education* and at the Society for the Advancement of Biology Education Research**

**Supplemental Figures and Tables**

Stanley M. Lo<sup>1, 2,\*</sup>, Grant E. Gardner<sup>3,\*</sup> Joshua Reid<sup>3</sup>, Velta Napoleon-Fanis<sup>3</sup>, Penny Carroll<sup>3</sup>, Emily Smith<sup>3</sup>, Brian K. Sato<sup>4,\*</sup>

<sup>1</sup>Section of Cell and Developmental Biology, Division of Biological Sciences and

<sup>2</sup>Program in Mathematics and Science Education, University of California San Diego, La Jolla, CA 92093

<sup>3</sup>Department of Biology, Middle Tennessee State University, Murfreesboro, TN 37132

<sup>4</sup>Department of Molecular Biology and Biochemistry, University of California Irvine, Irvine, CA 92697

\*Corresponding authors:

Stanley M. Lo: 9500 Gilman Drive #0355, La Jolla, CA 92093;

[smlo@ucsd.edu](mailto:smlo@ucsd.edu); 858-246-1087

Grant E. Gardner: 1301 East Main Street, Murfreesboro, TN 37132;

[Grant.Gardner@mtsu.edu](mailto:Grant.Gardner@mtsu.edu); 615-898-2062

Brian K. Sato: 2238 McGaugh Hall, MC3900, Irvine, CA 92697;

[bsato@uci.edu](mailto:bsato@uci.edu), 949-824-0661

**Figure S1. Study contexts of LSE articles.** Specific contexts found in LSE articles were coded as classroom interventions in a specific content area, course-wide classroom interventions, interventions lasting one or more years, week-long workshops (ws), multi-week workshops, or not reported. The ring on the left represents the complete LSE data from 2002-2015. The graph on the right illustrates the percentage of research questions found in LSE articles on an annual basis.

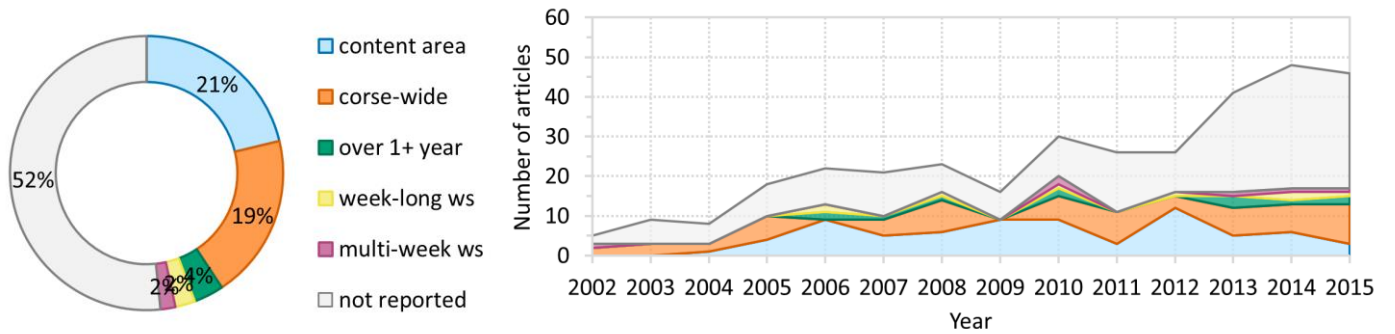

**Figure S2. Correlation between SABER presentation format and research methodologies.** Correspondence analysis (scatter plot) and hierarchical clustering (dashed circles) of data reveal three predominant combinations of presentation formats and methodologies at SABER: talks with quantitative or both methods, posters with qualitative methods, and roundtables with no methods reported.

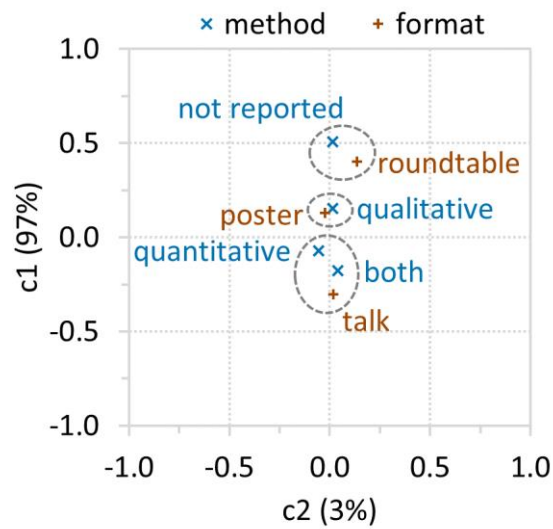

**Figure S3. Correlation between SABER presentation format and research topic.**

Correspondence analysis (top) and hierarchical clustering (bottom) of data reveal four predominant combinations of presentation formats and research topic at SABER: talks on curriculum, active learning, conceptual understanding, and process skills; roundtable presentations on science and society, affect, and virtual learning; posters on professional development, laboratory education, and metacognition; and diversity and instrument development as related topics.

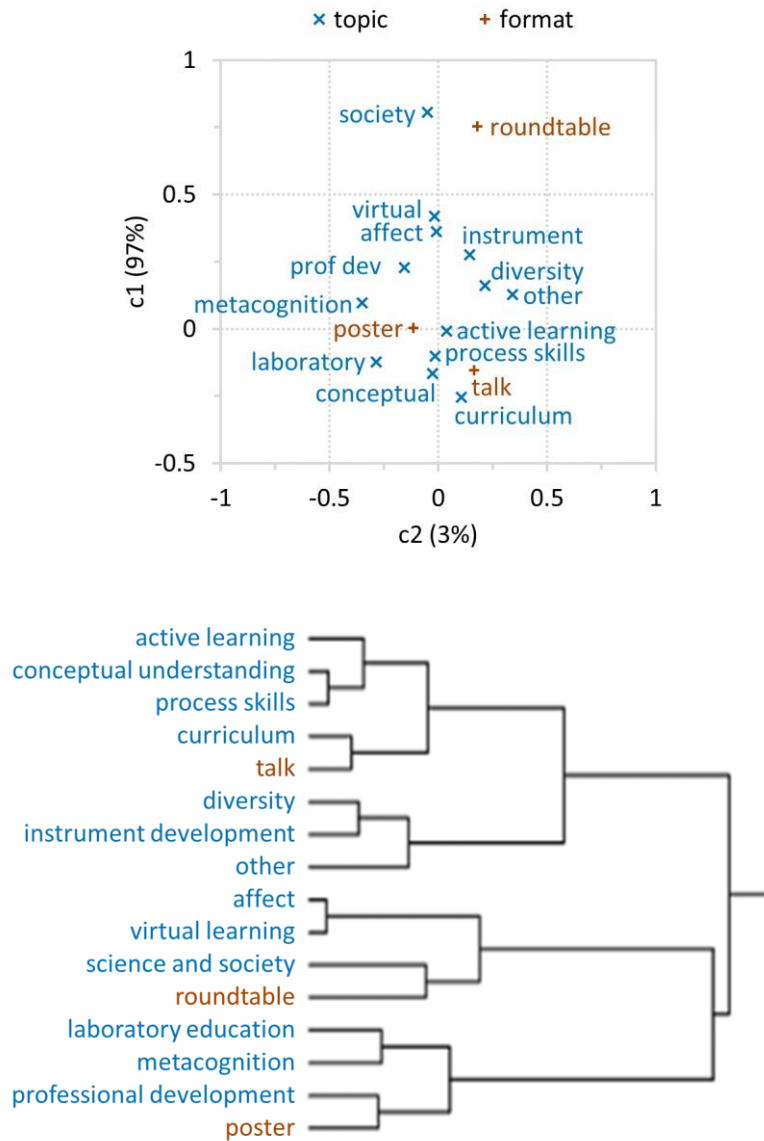

**Table S1-S10. LSE article or SABER abstract data per year(s) indicated.** Tables provide the specified data (number of articles or abstracts in each category) and the percentage of the total articles found in those categories.

**Table S1. Research questions in LSE articles**

| Year    | Causal    | Descriptive | Mechanistic | Total |
|---------|-----------|-------------|-------------|-------|
| 2002-06 | 27 (42%)  | 38 (58%)    | 0 (0%)      | 65    |
| 2007-11 | 49 (51%)  | 43 (44%)    | 5 (5%)      | 97    |
| 2012-15 | 61 (31%)  | 112 (56%)   | 27 (14%)    | 55    |
| Total   | 137 (38%) | 193 (53%)   | 32 (9%)     | 362   |

**Table S2. Research questions in SABER articles**

| Year  | Causal    | Descriptive | Mechanistic | Not reported | Total |
|-------|-----------|-------------|-------------|--------------|-------|
| 2011  | 61 (69%)  | 27 (30%)    | 1 (1%)      | 0 (0%)       | 89    |
| 2012  | 59 (62%)  | 33 (35%)    | 2 (2%)      | 1 (1%)       | 95    |
| 2013  | 96 (56%)  | 42 (31%)    | 4 (3%)      | 0 (0%)       | 142   |
| 2014  | 86 (34%)  | 55 (37%)    | 5 (3%)      | 1 (1%)       | 147   |
| 2015  | 120 (68%) | 51 (29%)    | 4 (2%)      | 1 (1%)       | 177   |
| Total | 422 (65%) | 208 (32%)   | 16 (2%)     | 4 (1%)       | 650   |

**Table S3. Study populations in LSE articles**

| Year    | Undergrad | K-12     | Grad or postdoc | Faculty | Comm College | Total |
|---------|-----------|----------|-----------------|---------|--------------|-------|
| 2002-06 | 46 (74%)  | 12 (19%) | 0 (0%)          | 4 (6%)  | 0 (0%)       | 62    |
| 2007-11 | 100 (86%) | 3 (3%)   | 4 (3%)          | 2 (2%)  | 7 (6%)       | 116   |
| 2012-15 | 109 (56%) | 14 (9%)  | 17 (11%)        | 9 (6%)  | 12 (7%)      | 161   |
| Total   | 255 (75%) | 29 (9%)  | 21 (6%)         | 15 (4%) | 19 (6%)      | 339   |

**Table S4. Study populations in SABER abstracts**

| Year  | Undergrad | K-12    | Grad or postdoc | Faculty  | Comm College | Not reported | Total |
|-------|-----------|---------|-----------------|----------|--------------|--------------|-------|
| 2011  | 69 (78%)  | 5 (5%)  | 4 (4%)          | 5 (5%)   | 1 (1%)       | 6 (6%)       | 88    |
| 2012  | 71 (69%)  | 3 (3%)  | 7 (7%)          | 10 (10%) | 0 (0%)       | 11 (11%)     | 102   |
| 2013  | 98 (66%)  | 4 (2%)  | 15 (10%)        | 22 (15%) | 0 (0%)       | 11 (7%)      | 150   |
| 2014  | 107 (70%) | 6 (4%)  | 13 (8%)         | 18 (12%) | 3 (2%)       | 7 (5%)       | 154   |
| 2015  | 130 (67%) | 7 (4%)  | 15 (8%)         | 23 (12%) | 2 (1%)       | 17 (9%)      | 194   |
| Total | 475 (69%) | 24 (4%) | 53 (8%)         | 78 (11%) | 6 (1%)       | 52 (8%)      | 688   |

**Table S5. At-risk demographics reported in LSE articles**

| Year    | Gender    | Race     | SES     | Total |
|---------|-----------|----------|---------|-------|
| 2002-06 | 16 (26%)  | 16 (26%) | 5 (8%)  | 37    |
| 2007-11 | 38 (33%)  | 22 (19%) | 5 (4%)  | 65    |
| 2012-15 | 71 (44%)  | 41 (25%) | 6 (4%)  | 118   |
| Total   | 125 (37%) | 79 (23%) | 16 (5%) | 220   |

**Table S6. At-risk demographics reported in SABER abstracts**

| Year  | Gender   | Race     | SES    | Total |
|-------|----------|----------|--------|-------|
| 2011  | 7 (7%)   | 3 (3%)   | 0 (0%) | 10    |
| 2012  | 2 (2%)   | 2 (2%)   | 0 (0%) | 4     |
| 2013  | 4 (3%)   | 7 (5%)   | 1 (1%) | 12    |
| 2014  | 8 (5%)   | 5 (3%)   | 1 (1%) | 14    |
| 2015  | 18 (9%)  | 14 (7%)  | 1 (1%) | 33    |
| Total | 39 (53%) | 31 (42%) | 3 (4%) | 73    |

**Table S7. Research methodologies in LSE articles**

| Year    | Qualitative | Quantitative | Both      | Total |
|---------|-------------|--------------|-----------|-------|
| 2002-06 | 7 (11%)     | 22 (35%)     | 33 (53%)  | 62    |
| 2007-11 | 18 (17%)    | 44 (40%)     | 47 (43%)  | 109   |
| 2012-15 | 14 (9%)     | 62 (39%)     | 84 (53%)  | 160   |
| Total   | 39 (12%)    | 128 (39%)    | 164 (50%) | 331   |

**Table S8. Research methodologies in SABER abstracts**

| Year  | Qualitative | Quantitative | Both      | Not reported | Total |
|-------|-------------|--------------|-----------|--------------|-------|
| 2011  | 8 (9%)      | 40 (43%)     | 30 (32%)  | 16 (17%)     | 94    |
| 2012  | 19 (19%)    | 25 (25%)     | 37 (37%)  | 19 (19%)     | 100   |
| 2013  | 23 (15%)    | 52 (34%)     | 52 (34%)  | 23 (15%)     | 151   |
| 2014  | 28 (19%)    | 37 (25%)     | 59 (39%)  | 27 (18%)     | 151   |
| 2015  | 28 (15%)    | 59 (31%)     | 70 (36%)  | 59 (17%)     | 192   |
| Total | 106 (15%)   | 213 (31%)    | 248 (36%) | 118 (17%)    | 688   |

**Table S9. Data collection in LSE articles**

| Year    | Instrument |           | Interview |           | Observe | Artifacts | Other data | Total |
|---------|------------|-----------|-----------|-----------|---------|-----------|------------|-------|
|         | -New       | -Existing | -New      | -Existing |         |           |            |       |
| 2002-06 | 41 (53%)   | 4 (5%)    | 6 (8%)    | 0 (0%)    | 2 (3%)  | 13 (17%)  | 11 (14%)   | 77    |
|         |            |           |           |           | 0 (0%)  |           |            |       |
| 2007-11 | 48 (47%)   | 14 (14%)  | 7 (7%)    | 0 (0%)    | 1 (1%)  | 27 (26%)  | 4 (4%)     | 102   |
|         |            |           |           |           | 1 (1%)  |           |            |       |
| 2012-15 | 99 (47%)   | 39 (19%)  | 20 (10%)  | 3 (1%)    | 7 (3%)  | 28 (13%)  | 13 (6%)    | 210   |
|         |            |           |           |           | 1 (0%)  |           |            |       |
| Total   | 188 (48%)  | 57 (15%)  | 33 (8%)   | 3 (1%)    | 10 (3%) | 255 (17%) | 28 (7%)    | 389   |
|         |            |           |           |           | 2 (1%)  |           |            |       |

**Table S10. Validity, reliability, and effect size reported in LSE articles**

| Year    | Validity  | Reliability | Effect Size | Total |
|---------|-----------|-------------|-------------|-------|
| 2002-06 | 16 (26%)  | 15 (24%)    | 2 (3%)      | 37    |
| 2007-11 | 43 (37%)  | 32 (28%)    | 3 (3%)      | 65    |
| 2012-15 | 105 (65%) | 97 (60%)    | 32 (19%)    | 118   |
| Total   | 164 (48%) | 144 (42%)   | 37 (11%)    | 220   |
